# Supplementary material for: Vasoactive intestinal peptide controls the suprachiasmatic circadian clock network via ERK1/2 and DUSP4 signalling
Source: PubMed Central journal article supplement (PMC6358603; doi:10.1038/s41467-019-08427-3), 2019-02-01
Supplement: 41467_2019_8427_MOESM1_ESM.pdf [file 41467_2019_8427_MOESM1_ESM.pdf]

**Vasoactive intestinal peptide controls the suprachiasmatic  
circadian clock network via ERK1/2 and DUSP4 signalling**

Hamnett et al.

# Supplementary Figure 1

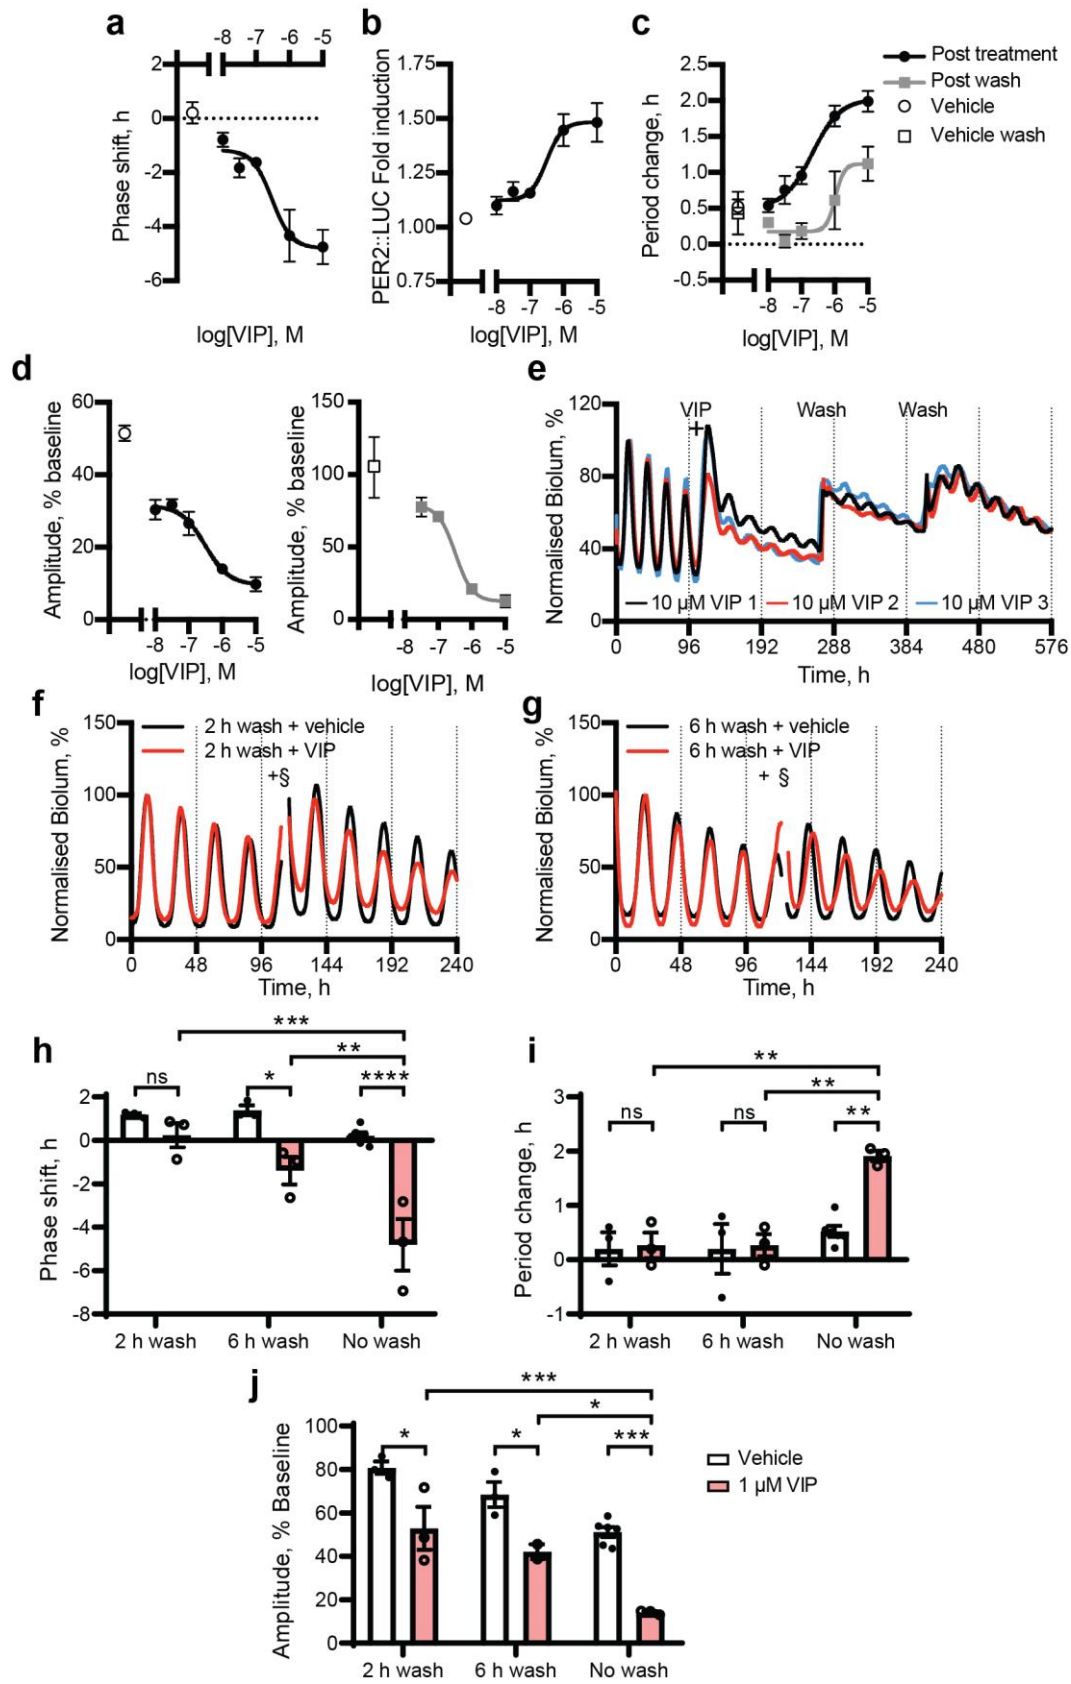

**Supplementary Figure 1 | VIP effects on SCN slice rhythmicity are dose- and duration-dependent (a-d)** Dose-dependent responses in phase shifts **(a)**, PER2::LUC fold induction **(b)**, period change **(c)** and relative amplitude change **(d)** (mean  $\pm$  SEM) following treatment with VIP. Grey squares in **(c,d)** represent values following media change. Data were fitted with a nonlinear regression. **(e)** Representative PER2::LUC bioluminescence rhythms of 3 SCN slices treated with 10  $\mu$ M VIP, followed by two media changes approximately 7 and 13 days after VIP treatment. **(f,g)** Representative PER2::LUC bioluminescence rhythms of SCN slices treated with 1  $\mu$ M VIP or vehicle at CT10 and washed off after 2 h **(f)** or after 6 h **(g)**. Treatments (marked by +) were followed by washing by 4 full media changes (marked by §). Bioluminescence has been normalised to the first peak. **(h-j)** Phase shift **(h)**, period change **(i)** and relative amplitude **(j)** responses (mean  $\pm$  SEM) to VIP followed by wash-off after 2 h (n = 3), 6 h (n = 3) or with no wash (n = 3) with vehicle controls (2 h: n = 3; 6 h: n = 3, no wash: n = 6). All tests two-way ANOVA with Tukey's multiple comparisons test, ns = not significant, \* $P$  < 0.05, \*\* $P$  < 0.01, \*\*\* $P$  < 0.001, \*\*\*\* $P$  < 0.0001.

## Supplementary Figure 2

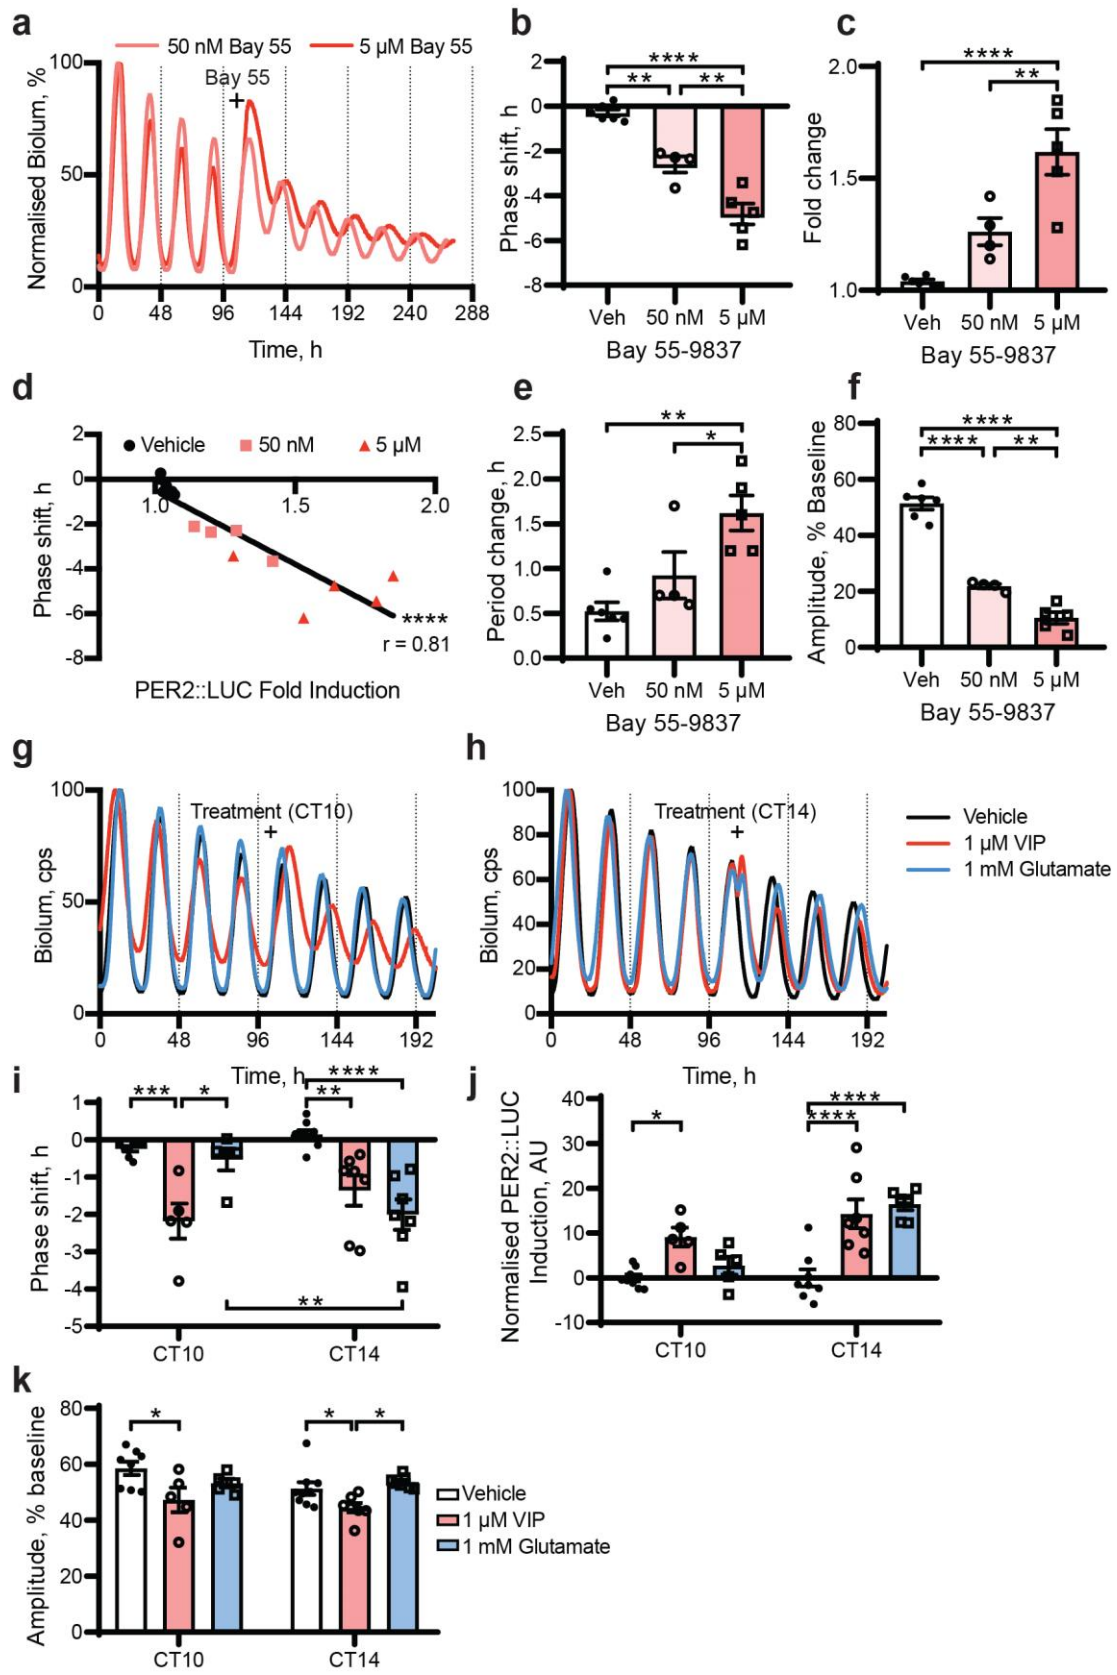

**Supplementary Figure 2 | VIP acts through the VPAC2 receptor and produces a distinct response to glutamate.** (a) Representative PER2::LUC bioluminescence rhythms of SCN slices treated with 50 nM or 5  $\mu$ M VPAC2 agonist Bay 55-9837 at CT10 (marked by +). Bioluminescence was normalised to the first peak. (b,c) Group data for phase shift (b) and PER2::LUC fold acute induction (c) (mean  $\pm$  SEM, n = 4, 5, 6 for 50 nM and 5  $\mu$ M Bay 55-9837, or vehicle respectively). (d) Scatterplot of immediate phase shifts vs. PER2::LUC acute induction following Bay 55-9837 treatment. Line represents computed linear regression, r = Pearson's correlation, \*\*\*\* $P$  < 0.0001. (e,f) Group data for period change (e), and relative amplitude (f) responses (mean  $\pm$  SEM) to 50 nM or 5  $\mu$ M Bay 55-9837 compared with vehicle. n as in (b,c). (b,c,e,f) were analysed with one-way ANOVA with Tukey's multiple comparisons. (g,h) Representative PER2::LUC bioluminescence rhythms of SCN slices treated with 1  $\mu$ M VIP or 1 mM glutamate by direct droplet application at CT10 (g) or CT14 (h). Bioluminescence was normalised to the first peak. (i-k) Phase shift (i), PER2 induction (j) and relative amplitude (k) responses (mean  $\pm$  SEM) to VIP, glutamate or vehicle at CT10 (n = 5, 5, 8 respectively) or CT14 (n = 7, 7, 9 respectively). PER2 induction (j) was normalised by setting mean of vehicle controls to zero. (i-k) were analysed with two-way ANOVA with Sidak's multiple comparisons. \* $P$  < 0.05, \*\* $P$  < 0.01, \*\*\* $P$  < 0.001, \*\*\*\* $P$  < 0.0001.

### Supplementary Figure 3

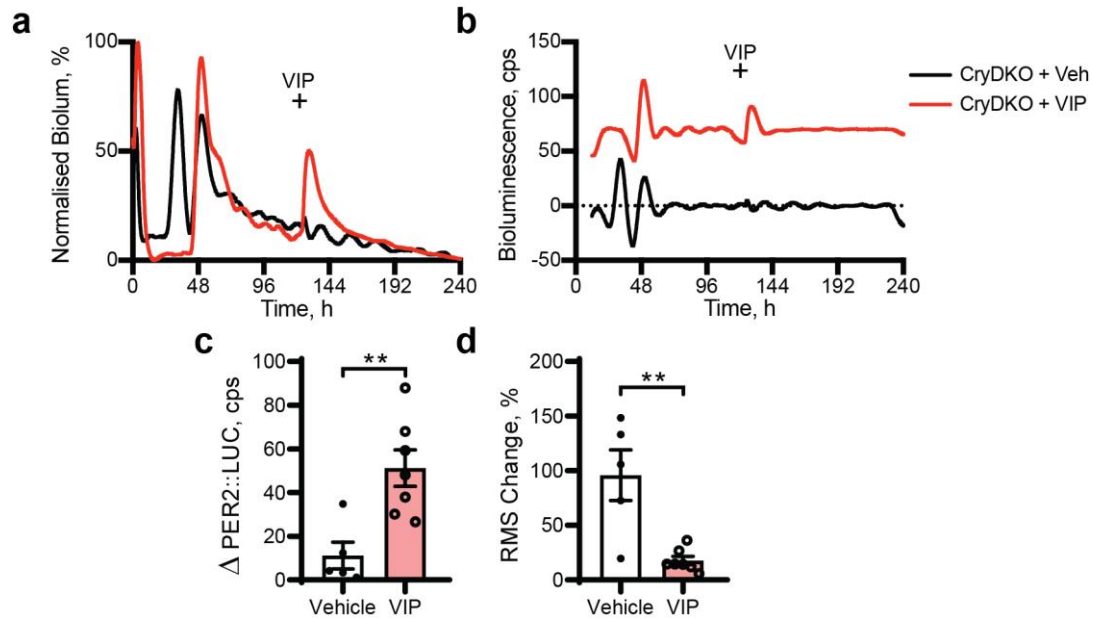

**Supplementary Figure 3 | VIP activates PER expression in the SCN independently of the cell-autonomous oscillator.** (a) Representative PER2::LUC bioluminescence rhythms of *Cry1*<sup>-/-</sup>*Cry2*<sup>-/-</sup> (CryDKO) SCN slices treated with vehicle or 1  $\mu$ M VIP (marked by +) at CT10 (phase determined by *Cry1*<sup>-/-</sup>*Cry2*<sup>+/-</sup> littermate slices, data not shown). Bioluminescence was normalised to the highest value in the recording. (b) Detrended (24 h baseline subtraction) PER2::LUC bioluminescence rhythms of slices in (a). The VIP-treated slice is offset on the y-axis to aid visualisation. (c) Group data for change in levels of PER2::LUC bioluminescence following treatment (n = 5 for vehicle, n = 7 for VIP, mean  $\pm$  SEM), calculated by subtracting the pre-VIP value from the highest value within the subsequent 6 h recording window. (d) Group data for relative root mean square (RMS) change (mean  $\pm$  SEM) following treatment. RMS was calculated based on data 48 h before and after treatment, omitting a 24 h window immediately after treatment, by taking the square root of averaged normalised, detrended and squared data. All tests unpaired t-tests, \*\**P* < 0.01.

## Supplementary Figure 4

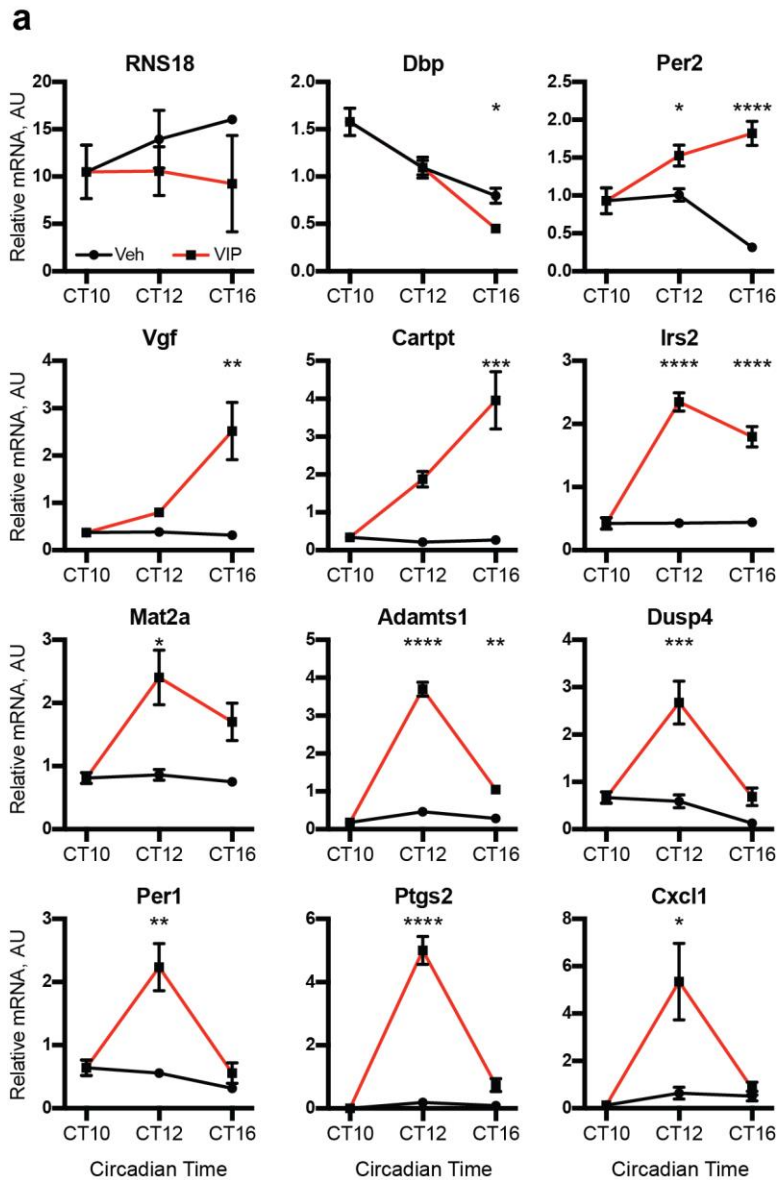

**Supplementary Figure 4 | qPCR validation of VIP microarray. (a)** Relative mRNA expression levels over time and VIP treatment assessed by qPCR (mean  $\pm$  SEM,  $n = 3$  for CT10, CT12 Veh, CT16 Veh,  $n = 4$  for CT12 VIP and CT16 VIP). All transcript levels except *Rns18* are normalised to *Rns18* quantity to control for total RNA variation. Two way ANOVA with Tukey's multiple comparisons test, \* $P < 0.05$ , \*\* $P < 0.01$ , \*\*\* $P < 0.001$ , \*\*\*\* $P < 0.0001$ .

## Supplementary Figure 5

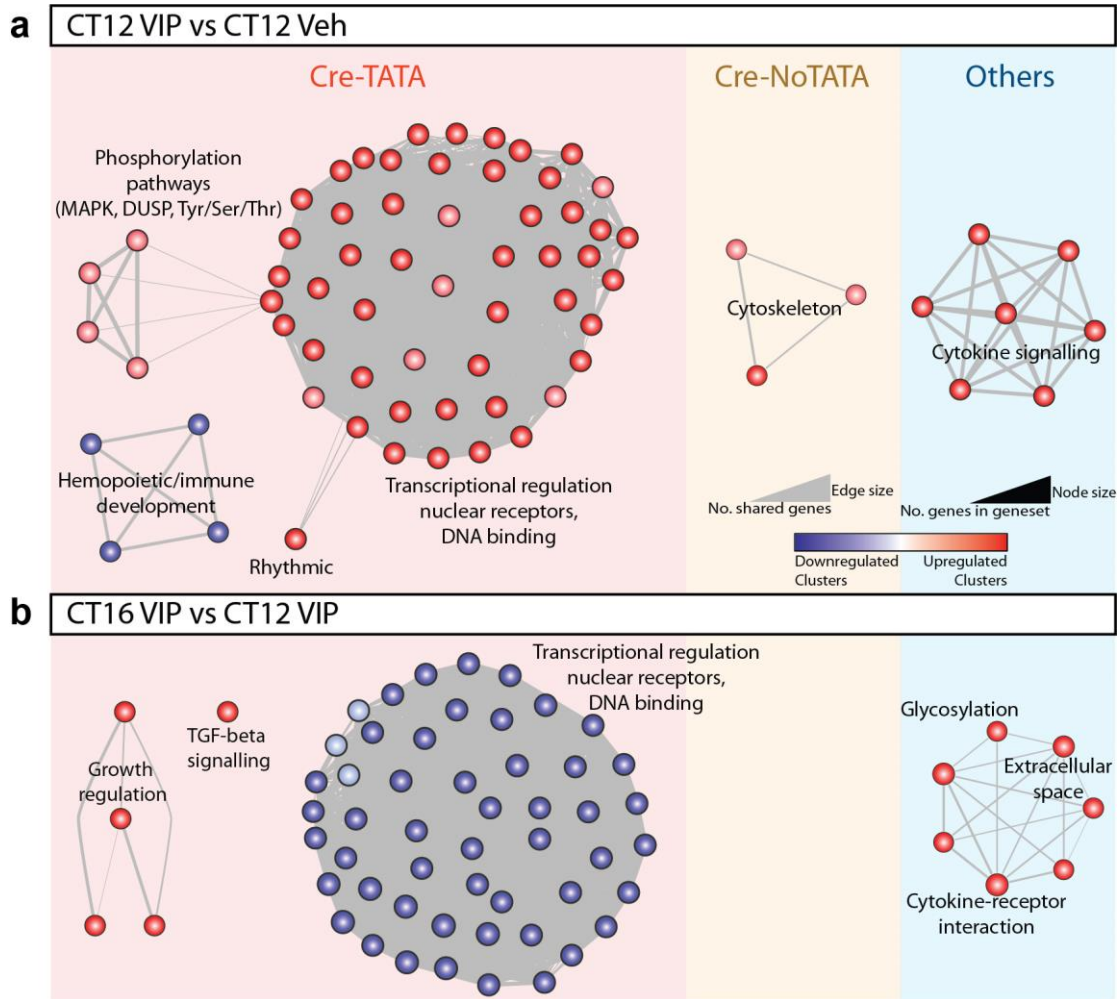

**Supplementary Figure 5 | Occurrence of CREs in promoters of VIP-regulated transcripts. (a,b)** Functional annotation of genes significantly altered by VIP treatment after 2 h **(a)** and after 6 h **(b)** segregated based on promoter elements. CRE-TATA: CRE within 300 bp of TATA box; CRE-NoTATA: CRE in promoter further upstream; Others: No CRE present in promoter (promoter defined as 3 kb upstream to 300 bp downstream of the transcription start site).



## Supplementary Figure 6

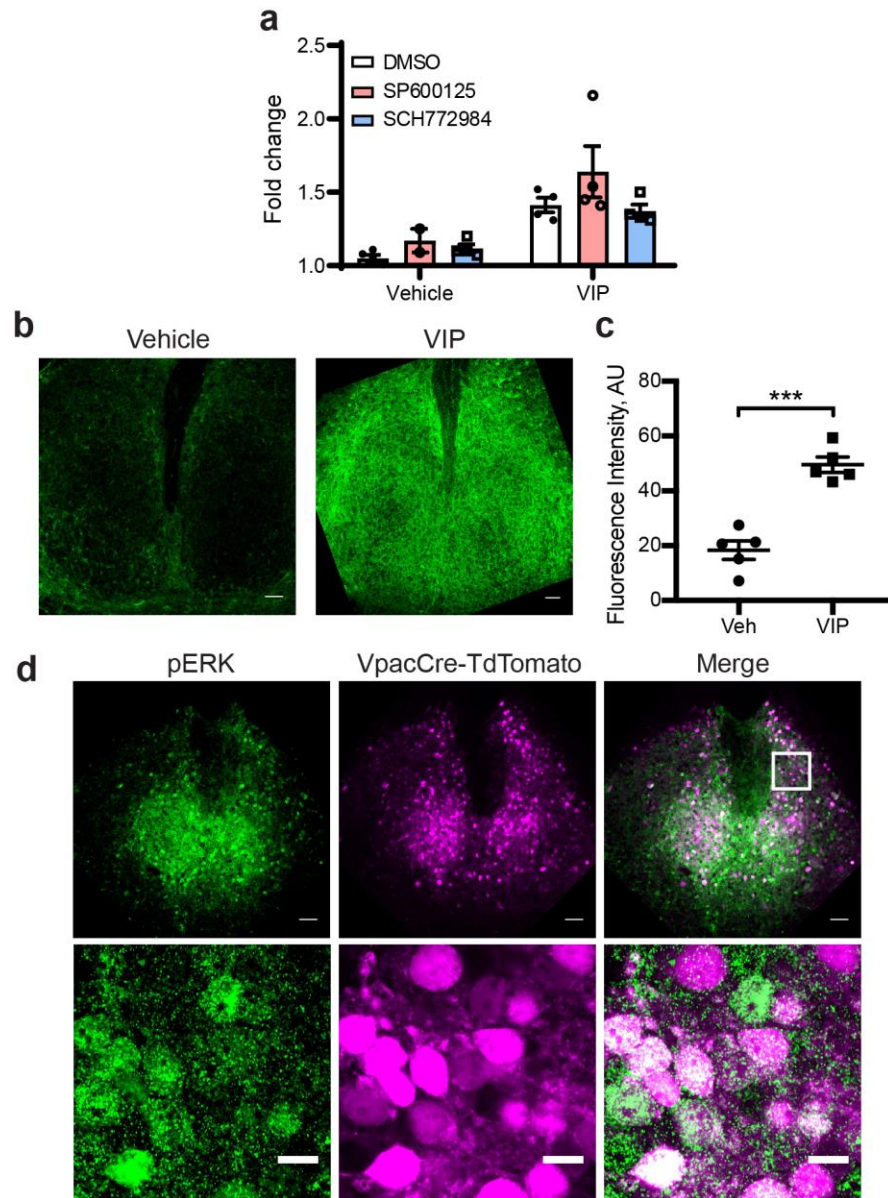

**Supplementary Figure 6 | VIP acts through the phospho-ERK1/2 pathway.** (a) Group data for acute fold induction of PER2::LUC after 3  $\mu$ M SP600125 (JNK1/2/3 inhibitor), 100 nM SCH772984 (ERK1/2 inhibitor) or vehicle. (b) Representative confocal micrographs of SCN slices immunostained using an anti-phospho-ERK1/2 antibody following a 30-minute treatment with vehicle or 100 nM VIP at CT10. Scale bars represent 50  $\mu$ m. (c) Group data for fluorescence intensity of SCN slices immunostained using an anti-phospho-ERK1/2 antibody following a 30 minute treatment with 100 nM VIP at CT10 as in (b) (mean  $\pm$  SEM, veh, n = 5; VIP, n = 5; unpaired t-test, \*\*\* $P$  < 0.001). (d) Confocal micrographs of a *VpacCre-TdTomato* SCN slice immunostained using an anti-phospho-ERK1/2 antibody following a 30-minute treatment with 100 nM VIP. Top: 20x. Bottom: 63x magnification of white boxed area. Scale bars represent 50  $\mu$ m (top) or 10  $\mu$ m (bottom).

## Supplementary Figure 7

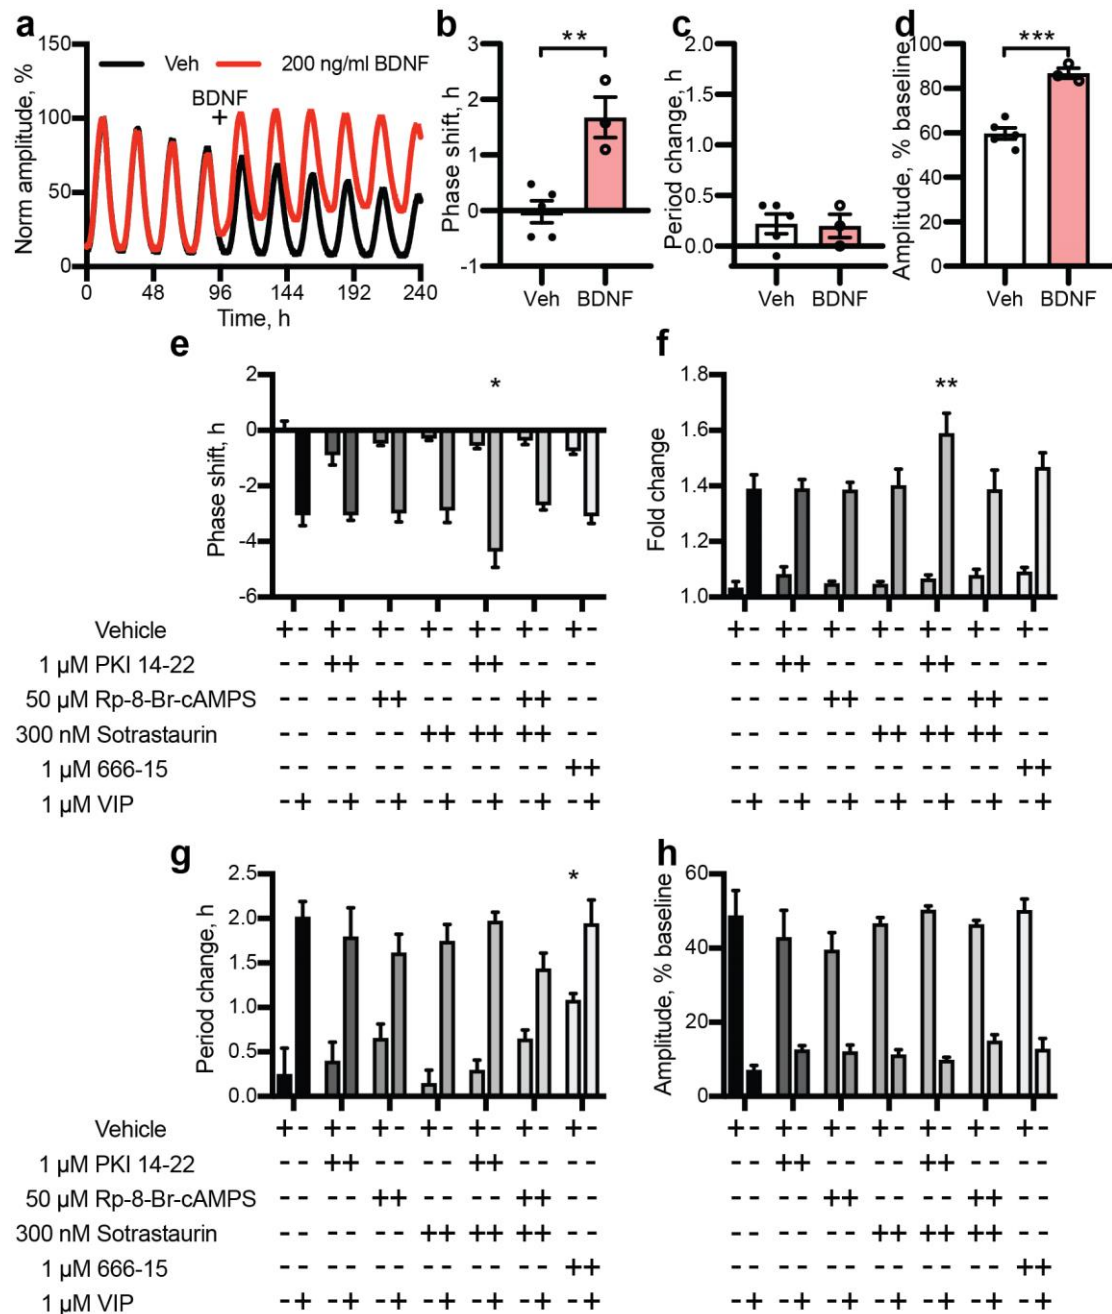

**Supplementary Figure 7 | Pharmacological analysis of pathways necessary for transducing the effects of VIP on SCN circadian properties.** (a) Representative PER2::LUC bioluminescence rhythms of SCN slices treated with 200 ng/ml BDNF or vehicle at CT16 (marked by +). Bioluminescence was normalised to the first peak. (b-d) Group data for phase shift (b), period change (c) and relative amplitude (d) responses (mean  $\pm$  SEM, unpaired t-test,  $**P < 0.01$ ,  $***P < 0.001$ ) to BDNF (n = 3) or vehicle (n = 5). (e-h) Group data for phase shift (e), PER2::LUC fold change (f), period change (g) and relative amplitude (h) responses to VIP or vehicle in the presence of inhibitors of PKA (1  $\mu$ M PKI 14-22 amide myristoylated; 50  $\mu$ M Rp-8-Br-cAMPS), PKC

(300 nM sotrastaurin) or CREB (1  $\mu$ M 666-15), alone or in combination as indicated. Two-way ANOVA with Dunnett's multiple comparisons test, n = 4-5 per group. \* denotes significant difference to vehicle control. \* $P$  < 0.05, \*\* $P$  < 0.01, \*\*\* $P$  < 0.001.

## Supplementary Figure 8

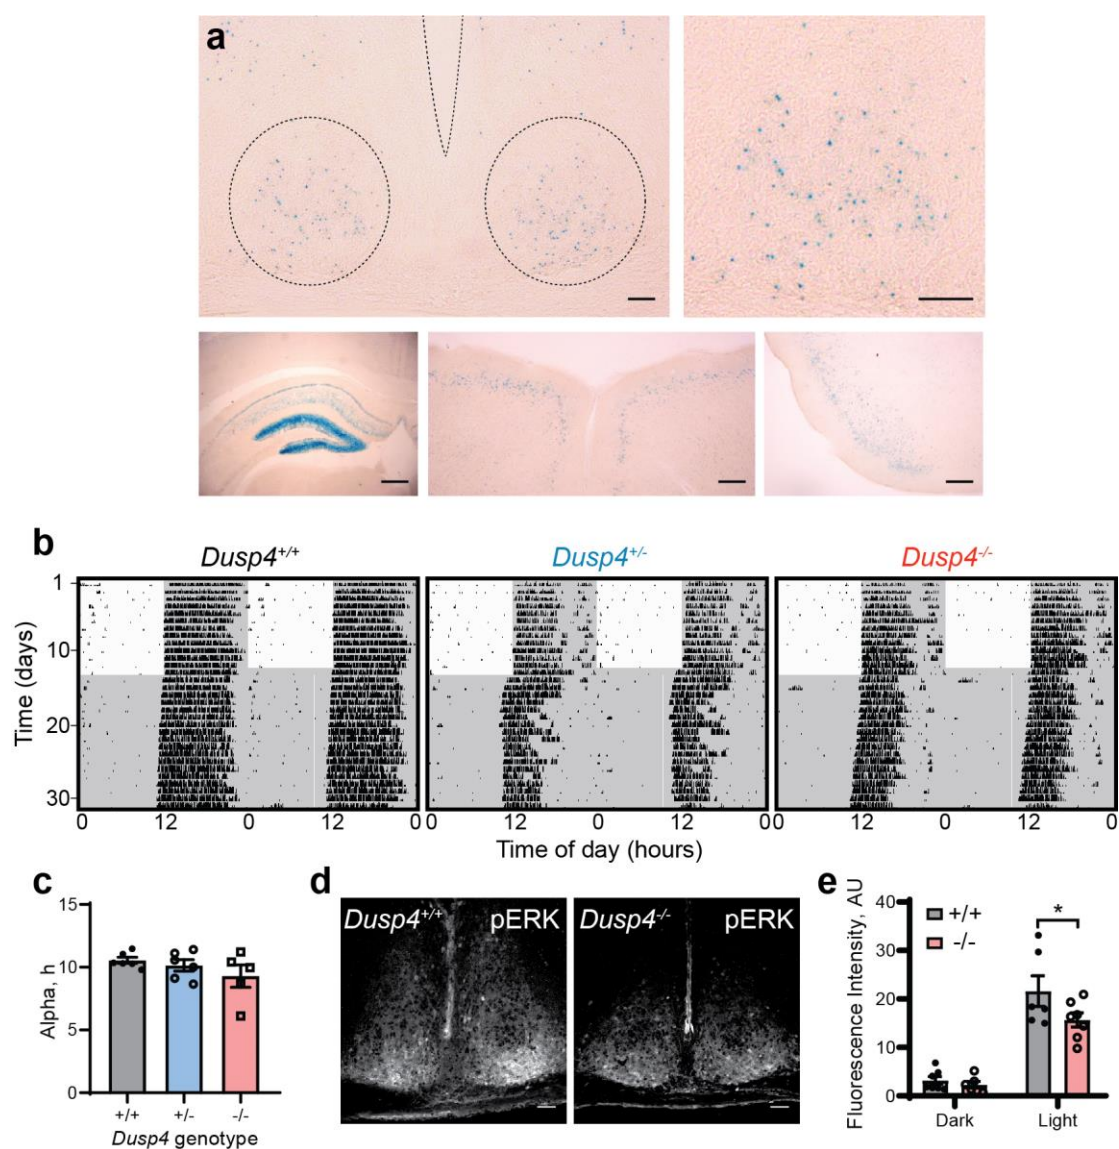

### Supplementary Figure 8 | Characterisation of the global *DUSP4*<sup>-/-</sup> mouse. (a)

Representative images of X-gal stained brain sections from mice homozygous for the *DUSP4*<sup>-/-</sup> allele, which contains a LacZ reporter gene inserted into the *Dusp4* locus. Staining was found in the SCN (top left, 10x, dotted lines delineate SCN and 3<sup>rd</sup> ventricle; close up top right, 20x), hippocampus (bottom left, 4x), cerebral cortex (bottom middle, 4x) and piriform cortex (bottom right, 4x). Scale bars represent 100  $\mu$ m (top row) or 250  $\mu$ m (bottom row). (b) Representative double-plotted actograms of wheel-running behaviour of *Dusp4*<sup>+/+</sup>, *Dusp4*<sup>+/-</sup> and *Dusp4*<sup>-/-</sup> mice exposed to a 12:12 light:dark (LD) cycle followed by continuous dim red light (DD) conditions. Grey shading represents dim red light. (c) Alpha (length of time between activity onset and offset) of *Dusp4*<sup>+/+</sup> (n = 6), *Dusp4*<sup>+/-</sup> (n = 6) and *Dusp4*<sup>-/-</sup> (n = 5) mice (mean  $\pm$  SEM) in DD. One-way ANOVA with Dunnett's multiple comparisons test. (d)

Representative confocal micrographs of SCN sections from *Dusp4<sup>+/+</sup>* and *Dusp4<sup>-/-</sup>* mice immunostained using an anti-phospho-ERK1/2 antibody following a 30-minute light pulse at ZT14. Scale bar represents 50  $\mu\text{m}$ . **(e)** Group data for fluorescence intensity of SCN sections immunostained using an anti-phospho-ERK1/2 antibody following a 30 minute light pulse at ZT14 as in **(d)** (mean  $\pm$  SEM, n = 6-7 mice per group). Two-way ANOVA with Sidak's multiple comparisons, \* $P < 0.05$ .

## Supplementary Figure 9

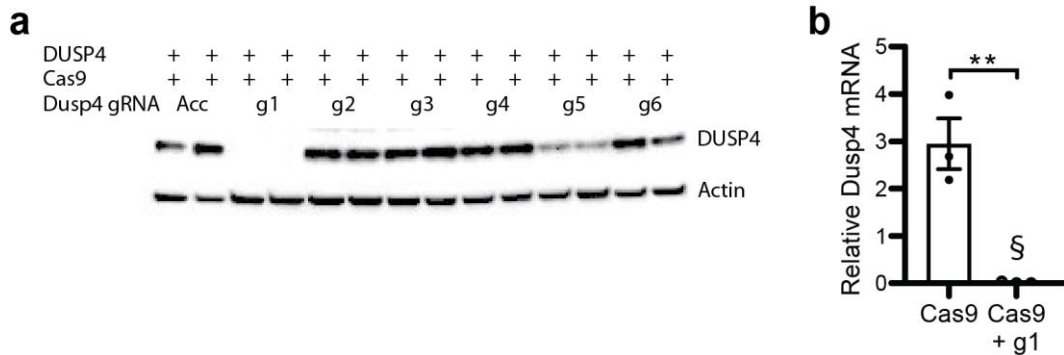

**Supplementary Figure 9 | Validation of CRISPR-mediated knockout of Dusp4.** (a) Representative Western blot using an anti-myc antibody for myc-tagged DUSP4 following transfection. N2A cells were transfected with *CMV.Dusp4-myc*, *Mecp2.SpCas9* and a gRNA construct designed against *Dusp4* (or the original gRNA ‘acceptor’ plasmid template, Acc), and harvested 72 h later. Actin serves as a loading control. n = 2 wells per condition. (b) Relative *Dusp4* mRNA expression (mean ± SEM, n = 3) assessed by qPCR in SCN slices following transduction with AAVs encoding *Mecp2.SpCas9* alone or with *U6.Dusp4g1.hSyn.GFP-KASH*. Expression levels were normalised to RNS18 levels to account for total RNA differences. §: When transduced with both Cas9 and g1, no *Dusp4* expression could be detected in 2/3 samples, while the 3<sup>rd</sup> had very low levels (relative expression: 0.1). Slices were harvested at CT6 (peak of *Dusp4* mRNA expression).

# Supplementary Figure 10

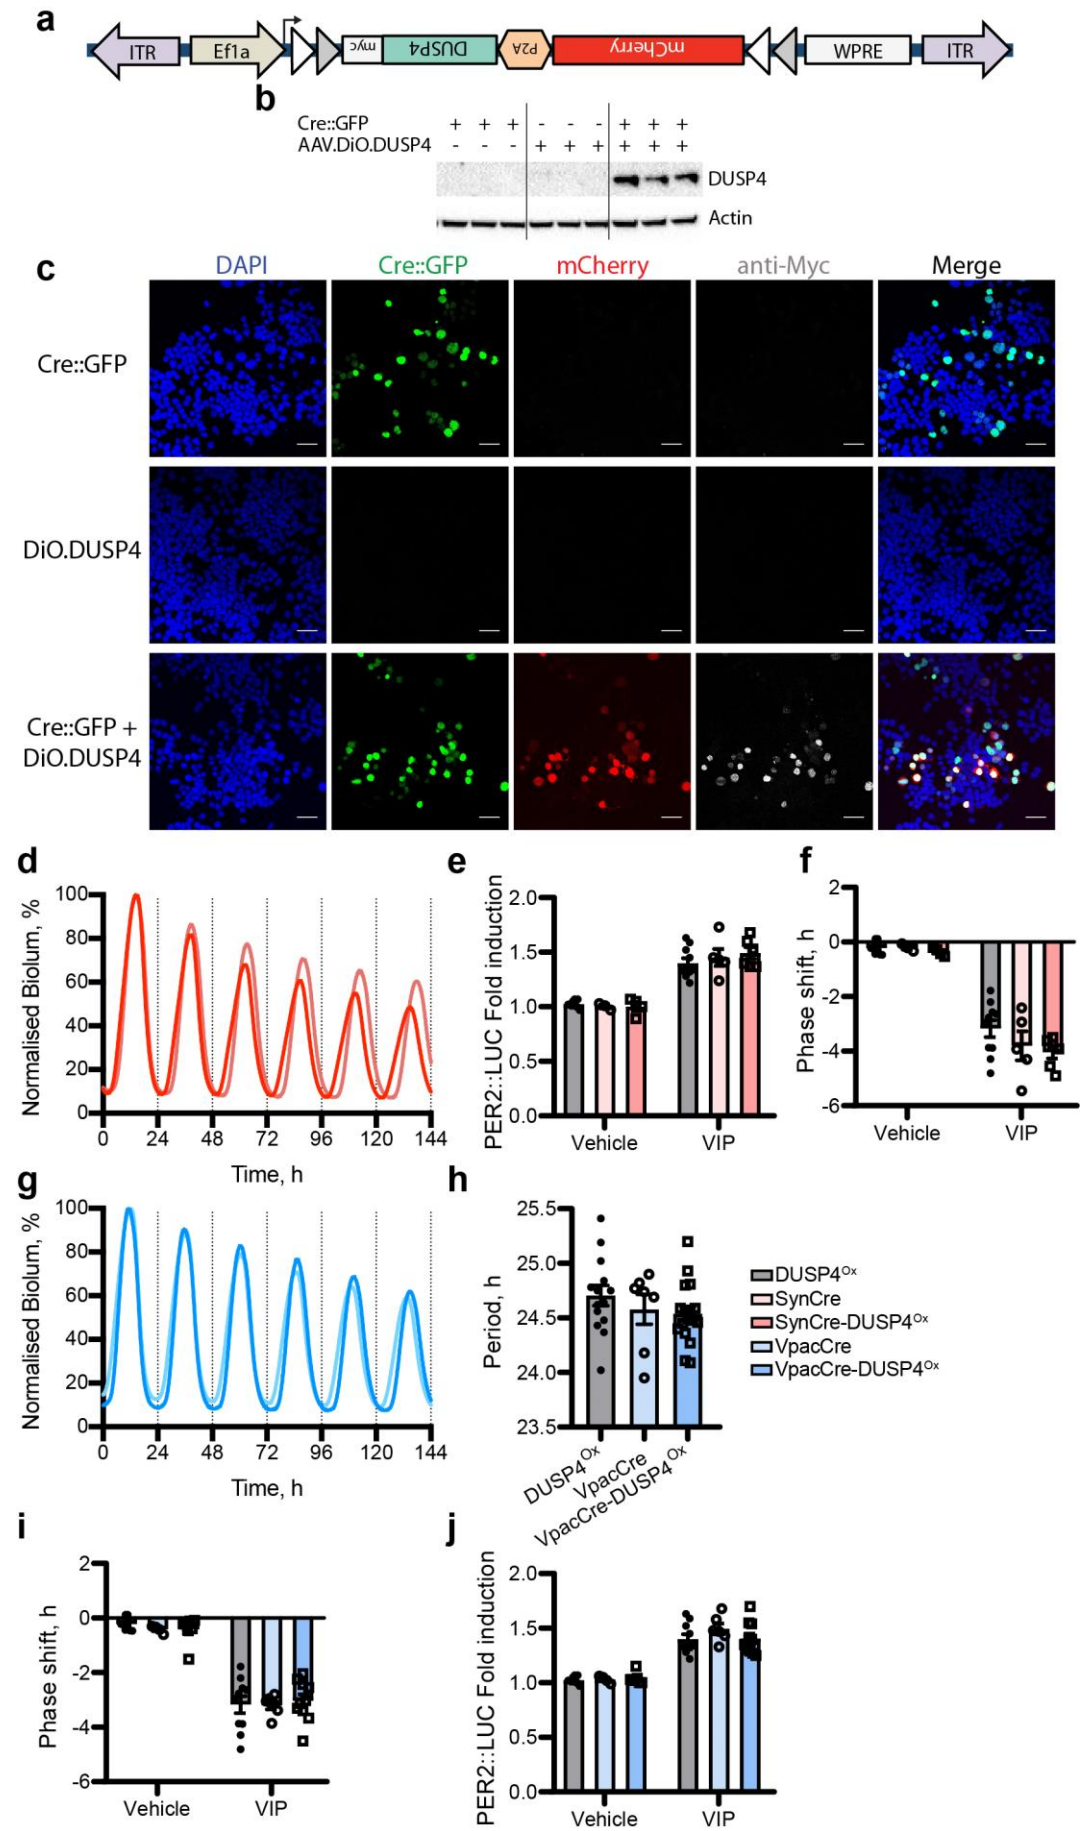

### Supplementary Figure 10 | Validation of Cre-mediated overexpression of *Dusp4*.

(a) Construct map of *Ef1a.DiO.mCherry-P2A-Dusp4*. DUSP4 and the mCherry are in a double-floxed inverse orientation (DiO). (b) Western blot using an anti-myc tag antiserum for myc-tagged DUSP4 following transfection. N2A cells were transfected with *Cre::GFP*, *Ef1a.DiO.mCherry-P2A-Dusp4*, or both plasmids. DUSP4 bands were only seen in the presence of Cre.  $n = 3$  per group. (c) Representative images of N2A cells transfected as in (b) and immunostained using an anti-myc antibody. mCherry expression and myc-tagged DUSP4 can only be seen in the presence of Cre. Myc-tagged DUSP4 shows the expected nuclear localisation, compared to mCherry, which is throughout the cell. Scale bar represents 50  $\mu\text{m}$ . (d) Representative PER2::LUC bioluminescence rhythms of *SynCre* and *SynCre-DUSP4<sup>Ox</sup>* slices before treatment. Bioluminescence has been normalised to the first peak. (e,f) Group data for post-treatment phase shift (e), and PER2 induction (f) (mean  $\pm$  SEM) of slices treated with vehicle or VIP at CT10.  $n$  as follows: *DUSP4<sup>Ox</sup>*: veh, 8; VIP, 10; *SynCre*: veh, 3; VIP, 5; *SynCre-DUSP4<sup>Ox</sup>*: veh, 4; VIP, 6. (g) Representative PER2::LUC bioluminescence rhythms of *VpacCre* and *VpacCre-DUSP4<sup>Ox</sup>* slices before treatment. Bioluminescence has been normalised to the first peak. (h) Group data for steady state (pre-treatment) period of slices transduced as in (g), along with *DUSP4<sup>Ox</sup>* controls (mean  $\pm$  SEM, one-way ANOVA,  $n = 14$  for *DUSP4<sup>Ox</sup>* group,  $n = 7$  for *VpacCre*,  $n = 16$  for *VpacCre-Dusp4<sup>Ox</sup>*). (i,j) Group data for post-treatment phase shift (i), and PER2 induction (j) (mean  $\pm$  SEM) of slices treated with vehicle or VIP at CT10. *DUSP4<sup>Ox</sup>* data replicated from (e,f).  $n$  as follows: *VpacCre*: veh, 4; VIP, 6; *VpacCre-DUSP4<sup>Ox</sup>*: veh, 7; VIP, 10. All tests in (e,f,i,j) were two-way ANOVAs with Tukey's multiple comparisons. \* $P < 0.05$ , \*\* $P < 0.01$ , \*\*\* $P < 0.001$ .
