# Supplementary material for: Vasoactive intestinal peptide controls the suprachiasmatic circadian clock network via ERK1/2 and DUSP4 signalling
Source: PubMed Central journal article supplement (PMC6358603; doi:10.1038/s41467-019-08427-3), 2019-02-01
Supplement: 41467_2019_8427_MOESM3_ESM.pdf [file 41467_2019_8427_MOESM3_ESM.pdf]

## Description of Additional Supplementary Files

**File Name:** Supplementary Movie 1

**Description:** PER2::Luciferase bioluminescence recording from SCN slice before and after treatment with VIP.

**File Name:** Supplementary Movie 2

**Description:** Simultaneous recordings of CRE::Luciferase bioluminescence and RCaMPfluorescence reporting intra-cellular calcium from SCN slice before and after treatment with VIP.
